# Supplementary figures and images for: Computational modelling of a competitive immunoassay in lateral flow diagnostic devices
Source: Royal Society of Chemistry journal article supplement (doi:10.1039/d2sd00211f), 2023-01-01

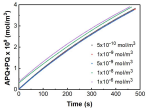

Supplement: d2sd00211f4.pdf [file d2sd00211f4.pdf]

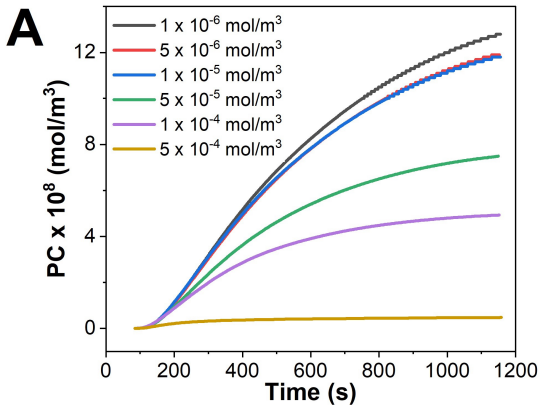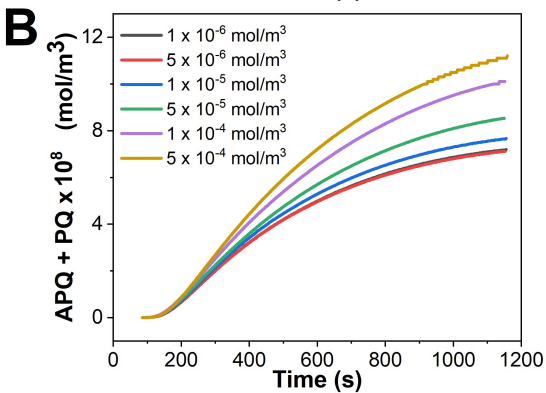

Supplement: d2sd00211f5.pdf [file d2sd00211f5.pdf]
